# Supplementary material for: Photogalvanic cells: comparative study of various synthetic dyes and natural photo sensitizers present in spinach extract
Source: Royal Society of Chemistry journal article supplement (doi:10.1039/c4ra08373c), 2014-01-01
Supplement: c4ra08373c1.pdf [file c4ra08373c1.pdf]

## **Photogalvanic cells: Comparative study of various synthetic dye and natural photo sensitizer present in spinach extract**

Pooran Koli\*, Department of Chemistry, Jai Narain Vyas University

Jodhpur – 342033, Rajasthan, INDIA

### **1. Method**

#### 1.1. Chemicals

The chemicals, Sudan-I of (>95 % Assay-Purity, HIMEDIA, Mumbai, INDIA) as photosensitizer, Rhodamine B (90 % Assay-Purity, Ases Chemical Works, Jodhpur, INDIA) as photosensitizer, Fast Green FCF (LOBA Chemie Pvt. Ltd., Mumbai, INDIA) as photosensitizer, Brilliant Cresyl Blue (Ases Chemical Works, Jodhpur, INDIA) as photosensitizer, Naphthol Green B (LOBA Chemie Pvt. Ltd., Mumbai, INDIA) as photosensitizer, aqueous Spinach Extract as source of natural photo-sensitizers, Fructose (99.8 % Assay-Purity, Ases Chemical Works, Jodhpur, INDIA) as reductant, Sodium lauryl sulfate-NaLS (94 % minimum Assay-Purity, Ases Chemical Works, Jodhpur, INDIA) as surfactant, NaOH (98 % Assay-Purity, Ases Chemical Works, Jodhpur, INDIA) as alkaline medium, and Oxalic Acid (99.5 % Assay-Purity, RANKEM, New Delhi, INDIA) for standardization of NaOH with Phenolphthalein (Merck Specialities Pvt. Ltd., Mumbai, INDIA) as indicator have been used.

---

Tel. & Fax +91 2912614162, E-mail: [poorankoli@rediffmail.com](mailto:poorankoli@rediffmail.com), [poorankoli@yahoo.com](mailto:poorankoli@yahoo.com)

Characteristics of Sudan-I (SUD) dye are M.F.  $C_{16}H_{12}N_2O$ , M.W. 248.28,  $\lambda_{max}$  476 nm, and Color Index No. 12055. Where,  $\lambda_{max}$  is wavelength of irradiation at which absorbance of dye is highest.

Characteristics of Rhodamine-B (RHD) dye are M.F.  $C_{28}H_{31}Cl N_2O_3$ , M.W. 479.02,  $\lambda_{max}$  (nm) 543,  $\epsilon$  ( $dm^3 mol^{-1} cm^{-1}$ ) 60000.0, and Color Index No. 45170. Where,  $\epsilon$  is molar absorptivity of Rhodamine-B dye (defined as equal to absorbance of solution having one molar concentration and one centimeter thickness).

Characteristics of Fast Green FCF (FGF) dye are M.F.  $C_{37}H_{34}N_2 Na_2O_{10}S_3$ , M.W. 808.84,  $\lambda_{max}$  ( nm) 622-626(high intensity band) and 427(low intensity band) in  $C_2H_5OH$  50%, 60 g/l solubility in water at 20°C, 5 g/l solubility in alcohol at 20°C and Color Index No. 42053.

Characteristics of Brilliant Cresyl Blue (BCB) dye are M.F.  $C_{17}H_{20}ClN_3O \cdot 0.5 ZnCl_2$ , M.W. 385.96,  $\lambda_{max}$  (nm) 622, UV-Visible Spectrum [at Conc. 0.005 g/l in 50% Ethanol, E 626(+/-3 nm)  $\geq$  40,000; E 250 (+/- 3 nm)  $\geq$  15,000; E238 (+/- 3 nm)  $\geq$  15,000], Solubility 1 mg/ml  $H_2O$  (Clear to opaque, blue solution) and Color Index No. 51010.

Characteristics of Naphthol Green B (NGB) dye are M.F.  $C_{30}H_{15}FeN_3Na_3O_{15}S_3$ , M.W. 878.46 g/mol,  $\lambda_{max}$  (nm) 714 in water (1 cm, 1 %, Aldrich) (315, 690 Gurr), (CAS number 19381-50-1 ,Color Index No. 10020, color Green. Naphthol Green B is the sodium salt of Naphthol Green Y (C.I. 10005). It can be solved in water, however not in ethanol. As an anion, it acts as acid dye.

Aqueous Spinach Extract (SPE) was used as source of natural photo-sensitizer(s). Aqueous Spinach Extract was obtained as (i) Fresh spinach leaves were washed with water, (ii) the washed and wet leaves (50 gm) were crushed in presence of a little water (10 ml) in a Jar

of electric mixer, (iii) then crushed matter was filtered with a ordinary filter paper, (iv) filtrate was left undisturbed for some time to allow sedimentation of fibrous and other matter, and (v) the transparent liquid above sediment was used as aqueous Spinach Extract for photosensitization of solution in photogalvanic cell.

Fresh spinach is convenient source of Chlorophyll a & b. The absorption band of chlorophyll-a is at 660 nm (in red region) & 430 nm (in blue) in diethylether. The absorption band of chlorophyll-b is at 650 nm (in red region) & 453 nm (in blue) in diethylether. Under the present experimental conditions, the absorption bands of crude spinach extract were observed at 680 nm (in red region) & 435 nm (in blue). Chlorophyll absorbs radiation almost over the range particularly in the blue-violet (470 nm) and red (650 nm -700 nm). The chlorophyll is the green photosynthetic pigment present in chloroplasts which provides the energy necessary for photosynthesis. The intense green color of chlorophyll is due to its strong absorbencies in the red and blue regions of the electromagnetic spectrum, and because of these absorbencies the light it reflects and transmits appears green.

The solutions, Sudan-I (SUD) dye (M/500, i.e., concentration is five hundredth part of one molar), Rhodamine-B (RHD) dye, Fast Green FCF(FGF), Brilliant Cresyl Blue (BCB) dye, Naphthol Green B (NGB), Aqueous Spinach Extract-SPE (as source of natural photosensitizers), Fructose (M/100,i.e., concentration is one hundredth part of one molar), NaLS (M/10, i.e., concentration is one tenth part of one molar), NaOH (1M, i.e., concentration is one molar) and Oxalic Acid (1M, i.e., concentration is one molar) have been used. All the solutions except Sudan-I have been prepared in single distilled water,

and kept in amber colored containers to protect them from sunlight. Solution of Sudan-I has been prepared in ethyl alcohol.

## **1.2. Basis for chemical composition of various cells**

The individual photosensitizers based Photogalvanic cells are thought to use only narrow solar spectrum for solar power generation and storage. The use of narrow spectrum (and failure to absorb broader spectrum) is cited as one of the reason for lower solar power output of these cells. So, with aim of using relatively wider part of solar spectrum, mixed photosensitizers having  $\lambda_{\max}$  in different spectral regions have been used. The various used photosensitizers with  $\lambda_{\max}$  (in nm) for mixing are NGB (714 nm), FCF (622 nm), BCB (622 nm), SPE (435 nm & 680 nm), RHD (543 nm) and SUD (476 nm). First, individual photosensitizer based cells were studied to use narrow solar spectrum for solar power generation. Among them one was NGB (714 nm) based cell for use of narrow spectrum (i.e., radiations near 700 nm). Thereafter, photogalvanic cells based on mixed photosensitizers were studied with aim of use of wider solar spectrum for solar power generation. The mixing of photosensitizers was done starting from NGB ( $\lambda_{\max}$  714 nm) side.

The NGB (714) based Photogalvanic cells are thought to use relatively narrow spectrum (700-800 nm). The NGB (714 nm) + FCF (622 nm) +BCB (622 nm) based Photogalvanic cells were studied for using relatively broader spectrum (i.e., radiations ranging from 800-700 to 700-600 nm) for solar power generation. The NGB (714 nm) + FCF (622 nm) + BCB (622 nm) + SPE (435 nm & 680 nm), based photogalvanic cells were studied for using relatively broader solar spectrum (i.e., radiations ranging from 800-700 to 700-600, 500-400 nm). On same pattern, some more cells were fabricated. Finally, a cell based on

NGB (714 nm) + FCF (622 nm) + BCB (622 nm) +SPE (435 nm & 680 nm) + RHD (543 nm) + SUD (476 nm) was studied for using almost whole visible region (i.e., 800-700 to 700-600 to 600-500 to 500-400 nm) for solar energy conversion and storage.

The electrical cell parameters for various individual and mixed photosensitizers are summarized in **Table 2** and **Fig. S5 (a,b)**.

### **1.3. Experimental set up**

The experimental set up consists of a H-cell (photogalvanic cell), natural sunlight, digital pH meter-Systronics Model:335 (for measuring potential in millivolt-mV), microammeter-OSAW (for measuring current in microampere- $\mu$ A), a carbon pot log 470 K device (for changing the resistance of circuit), and a circuit key, which are connected together as shown in photogalvanic cell set-up (**Fig.S7**).

The photogalvanic cell is made of glass tube of H-shape whose wall is externally blackened, but a window is left in one arm. The arm with window acts as illuminated chamber and other arm without window act as dark chamber<sup>13</sup>. This tube is filled with known amount of the solutions of photosensitizer, reductant, NaLS and Sodium hydroxide. The total volume of the solution is always kept 25 ml making up by singly distilled water. A platinum electrode (as negative terminal) is dipped in illuminated chamber against window and a Saturated Calomel Electrode-SCE of combination electrode (as positive terminal) is immersed in dark chamber. The terminals of the electrodes are connected to a digital pH meter.

**Table S1. Variation of potential with time.**

| Cell No. | Photosensitizer(s)<br>with $\lambda_{\max}$ (nm)                      | Variation of potential (mV) with time(min.) |     |     |     |     |      |            |               |
|----------|-----------------------------------------------------------------------|---------------------------------------------|-----|-----|-----|-----|------|------------|---------------|
|          |                                                                       | Time                                        | 0   | 11  | 26  | 63  | 65   | 70         |               |
| 1.       | NGB (714)                                                             | Potential                                   | 582 | 625 | 644 | 738 | 938  | $V_{\max}$ | 925 $V_{oc}$  |
| 2.       | FCF(622)                                                              | Time                                        | 0   | 37  | 56  | 72  | 80   |            | 85            |
|          |                                                                       | Potential                                   | 585 | 625 | 643 | 650 | 971  | $V_{\max}$ | 960 $V_{oc}$  |
| 3.       | BCB(622)                                                              | Time                                        | 0   | 10  | 20  | 30  | 33   |            | 38            |
|          |                                                                       | Potential                                   | 613 | 624 | 687 | 701 | 1045 | $V_{\max}$ | 1040 $V_{oc}$ |
| 4.       | SPE(435 & 680)                                                        | Time                                        | 0   | 34  | 37  | 59  | 68   |            | 75            |
|          |                                                                       | Potential                                   | 596 | 634 | 636 | 642 | 950  | $V_{\max}$ | 938 $V_{oc}$  |
| 5.       | RHD(543)                                                              | Time                                        | 0   | 17  | 22  | 28  | 30   |            | 35            |
|          |                                                                       | Potential                                   | 521 | 559 | 578 | 899 | 1012 | $V_{\max}$ | 1007 $V_{oc}$ |
| 6.       | SUD(476)                                                              | Time                                        | 0   | 14  | 18  | 20  | 21   |            | 26            |
|          |                                                                       | Potential                                   | 596 | 616 | 620 | 928 | 1020 | $V_{\max}$ | 1014 $V_{oc}$ |
| 7.       | NGB(714),FCF(622)                                                     | Time                                        | 0   | 10  | 40  | 48  | 53   |            | 57            |
|          |                                                                       | Potential                                   | 572 | 587 | 633 | 695 | 1007 | $V_{\max}$ | 1000 $V_{oc}$ |
| 8.       | NGB(714),FCF(622),<br>SPE (435 & 680)                                 | Time                                        | 0   | 12  | 25  | 40  | 44   |            | 55            |
|          |                                                                       | Potential                                   | 550 | 575 | 606 | 725 | 980  | $V_{\max}$ | 973 $V_{oc}$  |
| 9.       | NGB(714),FCF(622),<br>RHD(543)                                        | Time                                        | 0   | 15  | 35  | 40  | 45   |            | 50            |
|          |                                                                       | Potential                                   | 556 | 573 | 592 | 611 | 975  | $V_{\max}$ | 970 $V_{oc}$  |
| 10.      | NGB(714),FCF(622),<br>BCB(622),SPE(435&<br>680),RHD(543),<br>SUD(476) | Time                                        | 0   | 5   | 9   | 12  | 15   |            | 22            |
|          |                                                                       | Potential                                   | 541 | 560 | 602 | 657 | 1057 | $V_{\max}$ | 1040 $V_{oc}$ |
| 11.      | NGB(714)                                                              | Time                                        | 0   | 5   | 13  | 39  | 44   |            | 50            |
|          |                                                                       | Potential                                   | 520 | 524 | 575 | 723 | 1040 | $V_{\max}$ | 1040 $V_{oc}$ |
| 12.      | NGB(714),FCF(622),<br>BCB(622)                                        | Time                                        | 0   | 15  | 25  | 35  | 38   |            | 42            |
|          |                                                                       | Potential                                   | 591 | 640 | 692 | 744 | 1055 | $V_{\max}$ | 1052 $V_{oc}$ |
| 13.      | NGB(714),FCF(622),<br>BCB(622),SPE(435 &<br>680)                      | Time                                        | 0   | 13  | 28  | 30  | 31   |            | 32            |
|          |                                                                       | Potential                                   | 570 | 595 | 645 | 937 | 1002 | $V_{\max}$ | 999 $V_{oc}$  |
| 14.      | NGB(714),FCF(622),<br>BCB(622),SPE(435&<br>680),RHD (543)             | Time                                        | 0   | 16  | 43  | 44  | 48   |            | 52            |
|          |                                                                       | Potential                                   | 517 | 574 | 612 | 992 | 1067 | $V_{\max}$ | 1060 $V_{oc}$ |
| 15.      | NGB(714),FCF(622),<br>BCB(622),SPE(435&<br>680),RHD(543),<br>SUD(476) | Time                                        | 0   | 7   | 10  | 16  | 23   |            | 26            |
|          |                                                                       | Potential                                   | 492 | 584 | 927 | 981 | 1008 | $V_{\max}$ | 1004 $V_{oc}$ |

**Table S2. Change of power with time (Study of cell performance)**

| Cell No. | Photosensitizer(s)<br>with $\lambda_{\max}$ (nm) | Study of cell performance [Change of current ( $\mu\text{A}$ ), potential (mV) and power( $\mu\text{W}$ ) with time] |       |       |       |       |           |       |              |
|----------|--------------------------------------------------|----------------------------------------------------------------------------------------------------------------------|-------|-------|-------|-------|-----------|-------|--------------|
| 1.       | NGB (714)                                        | Time                                                                                                                 | 0     | 40    | 120   | 140   | $t_{0.5}$ | 147   | 152          |
|          |                                                  | Current                                                                                                              | 420   | 440   | 440   | 435   |           | 300   | 300          |
|          |                                                  | Potential                                                                                                            | 486   | 363   | 325   | 314   |           | 339   | 321          |
|          |                                                  | Power                                                                                                                | 204.1 | 159.7 | 156.2 | 136.5 |           | 101.7 | 96.3         |
| 2.       | FCF(622)                                         | Time                                                                                                                 | 0     | 10    | 15    | 27    | $t_{0.5}$ | 34    | 38           |
|          |                                                  | Current                                                                                                              | 420   | 350   | 340   | 310   |           | 300   | 300          |
|          |                                                  | Potential                                                                                                            | 443   | 399   | 345   | 312   |           | 309   | 298          |
|          |                                                  | Power                                                                                                                | 186   | 139.6 | 117.3 | 96.7  |           | 92.7  | 89.4         |
| 3.       | BCB(622)                                         | Time                                                                                                                 | 0     | 15    | 30    | 45    | $t_{0.5}$ | 63    | 68           |
|          |                                                  | Current                                                                                                              | 450   | 430   | 400   | 360   |           | 320   | 320          |
|          |                                                  | Potential                                                                                                            | 482   | 427   | 361   | 349   |           | 334   | 309          |
|          |                                                  | Power                                                                                                                | 216.9 | 183.6 | 144.4 | 125.6 |           | 106.8 | 98.8         |
| 4.       | SPE(435 & 680)                                   | Time                                                                                                                 | 0     | 10    | 20    | 30    |           | 44    | $50 t_{0.5}$ |
|          |                                                  | Current                                                                                                              | 600   | 570   | 530   | 490   |           | 450   | 450          |
|          |                                                  | Potential                                                                                                            | 440   | 411   | 349   | 313   |           | 302   | 291          |
|          |                                                  | Power                                                                                                                | 264   | 234.2 | 184.9 | 153.3 |           | 135.9 | 130.9        |
| 5.       | RHD(543)                                         | Time                                                                                                                 | 0     | 5     | 9     | 15    | $t_{0.5}$ | 26    | 31           |
|          |                                                  | Current                                                                                                              | 600   | 570   | 550   | 490   |           | 430   | 410          |
|          |                                                  | Potential                                                                                                            | 454   | 440   | 410   | 357   |           | 313   | 310          |
|          |                                                  | Power                                                                                                                | 272.4 | 250.8 | 225.5 | 174.9 |           | 134.5 | 127.1        |
| 6.       | SUD(476)                                         | Time                                                                                                                 | 0     | 6     | 12    | 18    | $t_{0.5}$ | 30    | 34           |
|          |                                                  | Current                                                                                                              | 600   | 570   | 530   | 480   |           | 430   | 410          |
|          |                                                  | Potential                                                                                                            | 528   | 486   | 411   | 304   |           | 251   | 233          |
|          |                                                  | Power                                                                                                                | 316.8 | 277   | 217.8 | 145.9 |           | 107.9 | 95.5         |
| 7.       | NGB(714),FCF(622)                                | Time                                                                                                                 | 0     | 8     | 12    | 15    | $t_{0.5}$ | 17    | 22           |
|          |                                                  | Current                                                                                                              | 520   | 550   | 540   | 510   |           | 420   | 340          |
|          |                                                  | Potential                                                                                                            | 518   | 416   | 402   | 381   |           | 315   | 240          |
|          |                                                  | Power                                                                                                                | 269.3 | 228.8 | 217   | 194.3 |           | 132.3 | 81.6         |
| 8.       | NGB(714),FCF(622),<br>SPE (435 & 680)            | Time                                                                                                                 | 0     | 6     | 54    | 84    | $t_{0.5}$ | 125   | 128          |
|          |                                                  | Current                                                                                                              | 520   | 425   | 400   | 390   |           | 320   | 300          |
|          |                                                  | Potential                                                                                                            | 478   | 523   | 465   | 455   |           | 370   | 350          |
|          |                                                  | Power                                                                                                                | 248.5 | 222.2 | 186   | 177.4 |           | 118.4 | 105          |
| 9.       | NGB(714),FCF(622),<br>RHD(543)                   | Time                                                                                                                 | 0     | 5     | 10    | 20    | $t_{0.5}$ | 30    | 34           |
|          |                                                  | Current                                                                                                              | 540   | 540   | 530   | 500   |           | 380   | 370          |
|          |                                                  | Potential                                                                                                            | 470   | 440   | 389   | 370   |           | 329   | 318          |
|          |                                                  | Power                                                                                                                | 253.8 | 237.6 | 206.1 | 185   |           | 125   | 117.7        |

|     |                                                                       |           |       |        |       |       |                      |       |
|-----|-----------------------------------------------------------------------|-----------|-------|--------|-------|-------|----------------------|-------|
| 10. | NGB(714),FCF(622),<br>BCB(622),SPE(435&<br>680),RHD(543),<br>SUD(476) | Time      | 0     | 4      | 9     | 14    | 19 t <sub>0.5</sub>  | 24    |
|     |                                                                       | Current   | 660   | 630    | 580   | 510   | 470                  | 460   |
|     |                                                                       | Potential | 460   | 400    | 367   | 303   | 320                  | 301   |
|     |                                                                       | Power     | 303.6 | 252    | 212.8 | 155.8 | 150.4                | 138.4 |
| 11. | NGB(714)                                                              | Time      | 0     | 40     | 100   | 180   | 260 t <sub>0.5</sub> | 270   |
|     |                                                                       | Current   | 800   | 780    | 760   | 610   | 560                  | 560   |
|     |                                                                       | Potential | 528   | 493    | 423   | 411   | 376                  | 363   |
|     |                                                                       | Power     | 422.4 | 384.5  | 321.4 | 250.7 | 210.5                | 203.2 |
| 12. | NGB(714),FCF(622),<br>BCB(622)                                        | Time      | 0     | 14     | 25    | 35    | 51 t <sub>0.5</sub>  | 60    |
|     |                                                                       | Current   | 850   | 780    | 710   | 640   | 600                  | 580   |
|     |                                                                       | Potential | 511   | 467    | 401   | 379   | 361                  | 341   |
|     |                                                                       | Power     | 434.3 | 364.2  | 284.7 | 242.5 | 216.6                | 197.7 |
| 13. | NGB(714),FCF(622),<br>BCB(622),SPE(435 &<br>680)                      | Time      | 0     | 10     | 22    | 26    | 32 t <sub>0.5</sub>  | 37    |
|     |                                                                       | Current   | 1000  | 930    | 860   | 810   | 710                  | 680   |
|     |                                                                       | Potential | 464   | 422    | 385   | 332   | 323                  | 319   |
|     |                                                                       | Power     | 464   | 392.46 | 331.1 | 268.9 | 229.3                | 216.9 |
| 14. | NGB(714),FCF(622)<br>,BCB(622),SPE(435<br>& 680),RHD (543)            | Time      | 0     | 4      | 8     | 10    | 14 t <sub>0.5</sub>  | 19    |
|     |                                                                       | Current   | 850   | 800    | 730   | 680   | 600                  | 580   |
|     |                                                                       | Potential | 477   | 436    | 401   | 342   | 333                  | 313   |
|     |                                                                       | Power     | 405.4 | 347.2  | 292.7 | 232.5 | 199.8                | 181.5 |
| 15. | NGB(714),FCF(622)<br>,BCB(622),SPE(435<br>&680),RHD(543),<br>SUD(476) | Time      | 0     | 5      | 12    | 20    | 31 t <sub>0.5</sub>  | 0     |
|     |                                                                       | Current   | 750   | 690    | 610   | 560   | 530                  | 750   |
|     |                                                                       | Potential | 463   | 422    | 377   | 345   | 326                  | 463   |
|     |                                                                       | Power     | 347.2 | 291.1  | 229.9 | 193.2 | 172.7                | 347.2 |



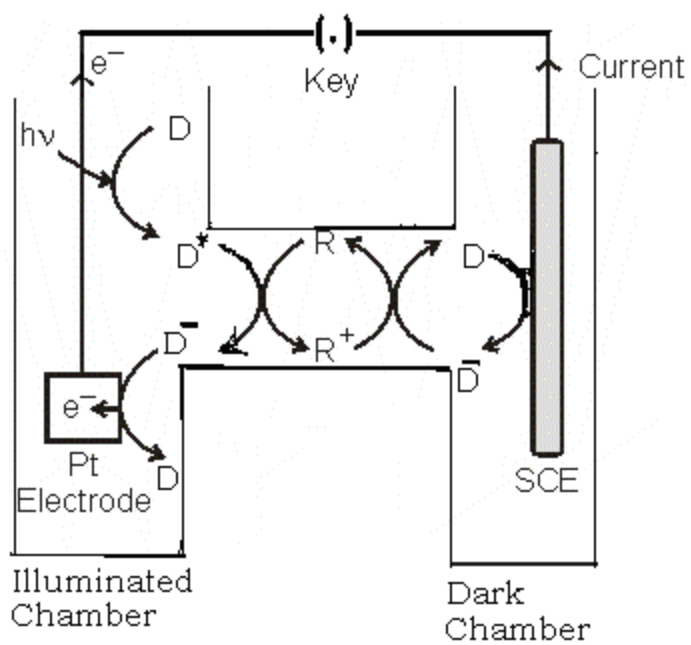

**Fig. S 1.** Mechanism of photogeneration of current in photogalvanic cell. SCE, Saturated Calomel Electrode; D, Dye (Photosensitizer);  $D^+$ , Oxidized form of Dye;  $R^+$ , Oxidized form of reductant ;  $e^-$ , Electron.

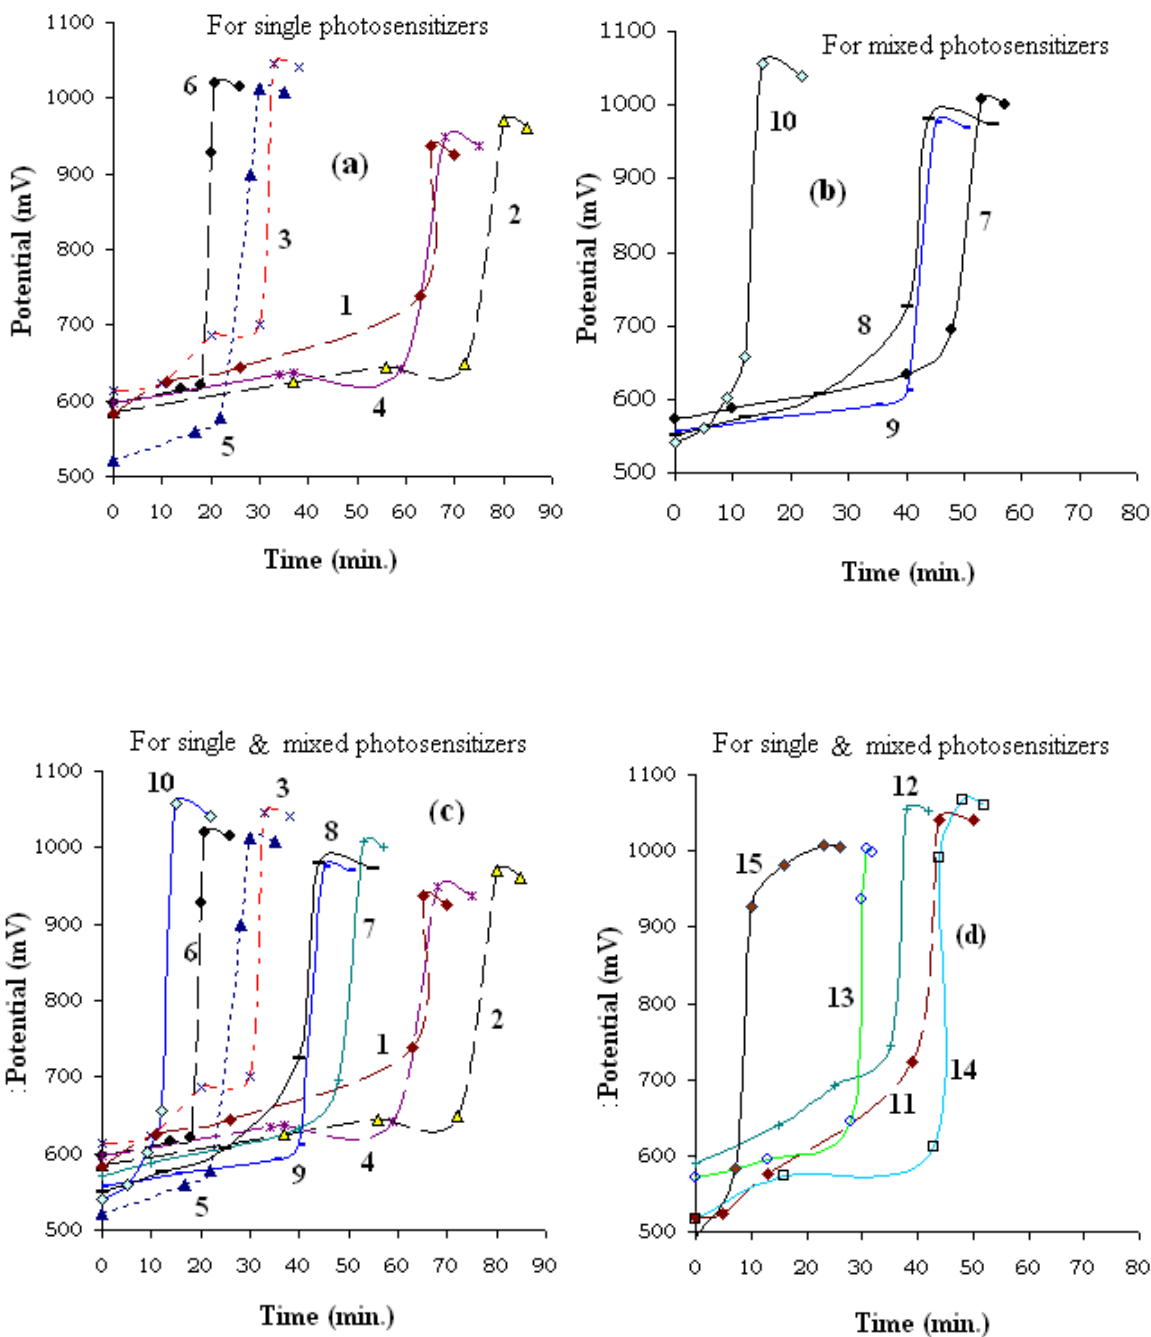

**Fig. S2(a,b,c,d).** Variation of potential with time, 1.NGB (714 nm), 2.FCF(622 nm), 3. BCB(622 nm), 4.SPE(435 nm & 680 nm), 5.RHD(543 nm), 6. SUD(476 nm), 7. NGB,FCF, 8.NGB,FCF,SPE, 9. NGB,FCF,RHD , 10. NGB,FCF,BCB,SPE,RHD, SUD, 11.NGB, 12.NGB,FCF,BCB, 13.NGB,FCF,BCB,SPE, 14.NGB,FCF,BCB,SPE,RH D, 15. NGB,FCF,BCB,SPE,RHD,SUD.

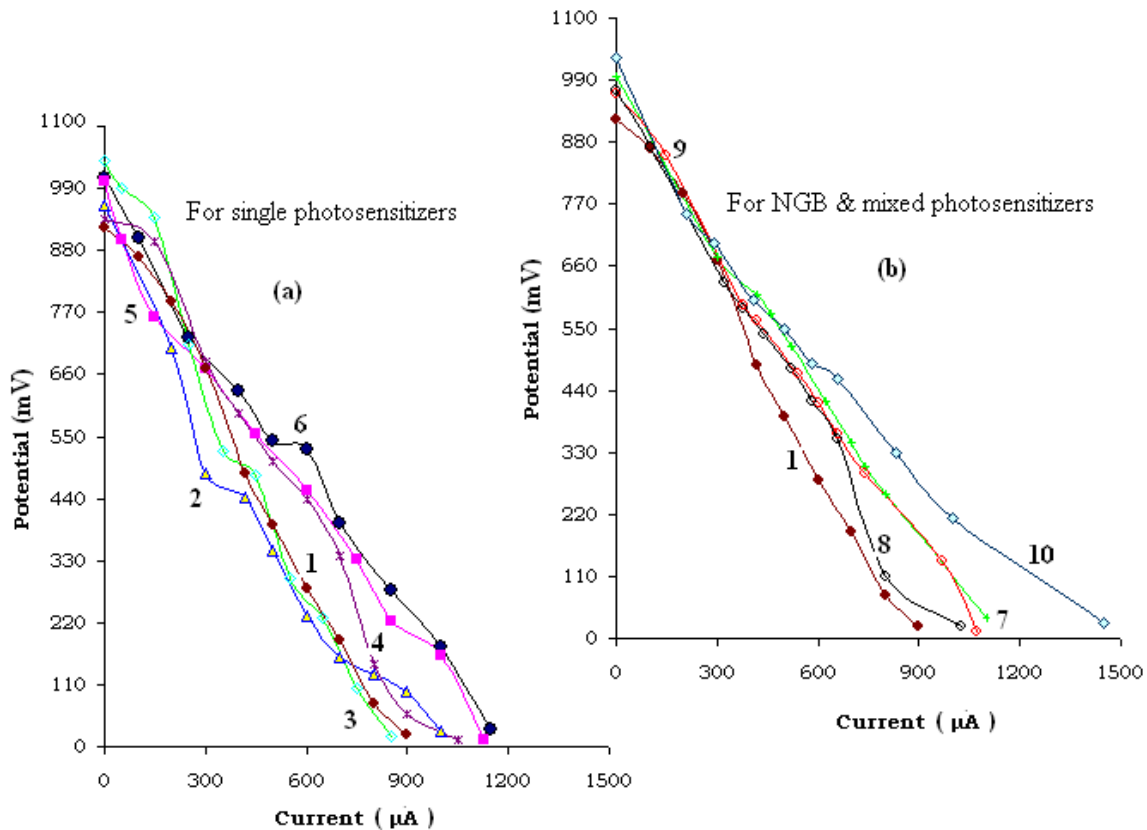

**Fig. S3(a,b) Variation of potential with current ( $i$ - $V$  characteristic of the cell), 1.NGB (714 nm),2.FCF(622 nm),3.BCB(622 nm),4.SPE(435 nm & 680 nm),5.RHD(543nm),6.SUD(476nm),7.NGB,FCF,8.NGB,FCF,SPE,9.NGB,FCF,RHD, 10.NGB,FCF,BCB,SPE,RHD,SUD,11.NGB,12.NGB,FCF,BCB,13.NGB,FCF,BCB,SP E,14.NGB,FCF,BCB,SPE,RHD,15. NGB,FCF,BCB,SPE,RHD,SUD.**

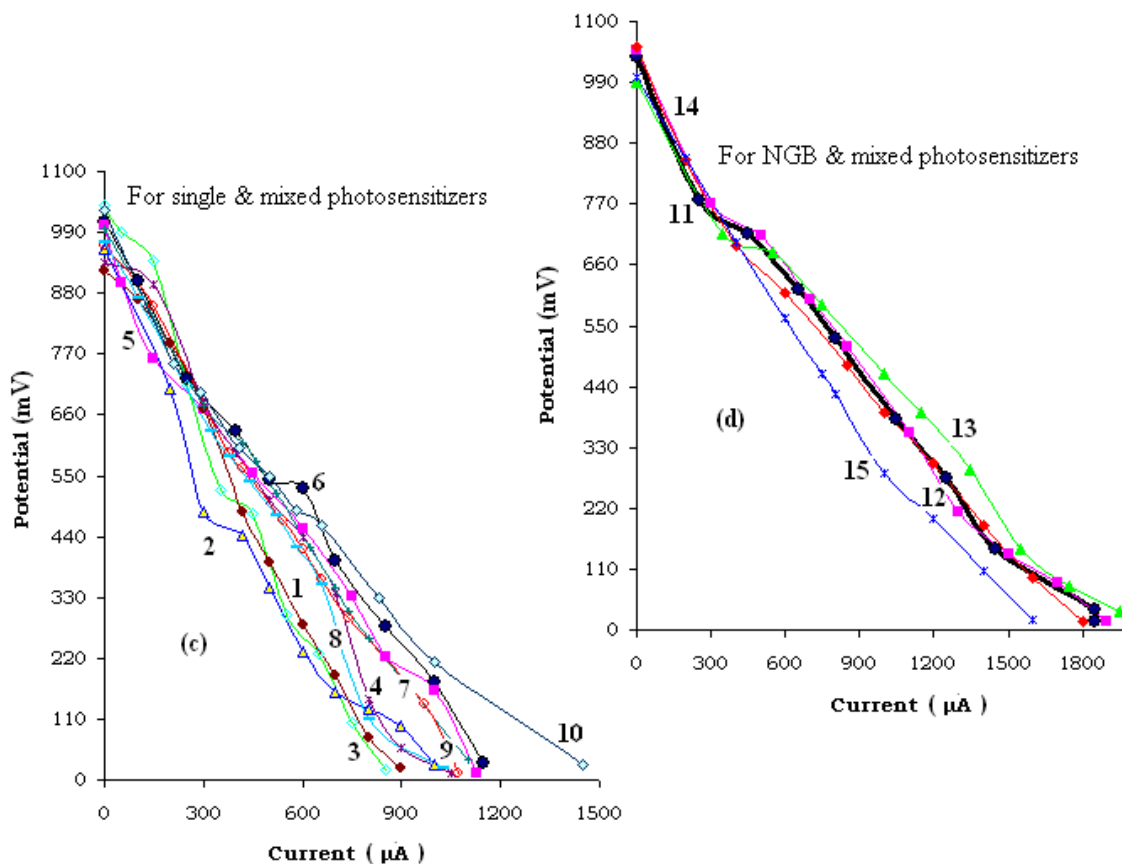

**Fig. S3(c,d) Variation of potential with current(  $i$ -  $V$  characteristic of the cell),**  
**1.NGB (714 nm),2.FCF(622 nm),3.BCB(622 nm),4.SPE(435 nm & 680 nm),5.RHD(543nm),6.SUD(476nm),7.NGB,FCF,8.NGB,FCF,SPE,9.NGB,FCF,RHD,**  
**10.NGB,FCF,BCB,SPE,RHD,SUD,11.NGB,12.NGB,FCF,BCB,13.NGB,FCF,BCB,SP**  
**E,14.NGB,FCF,BCB,SPE,RHD,15. NGB,FCF,BCB,SPE,RHD,SUD.**

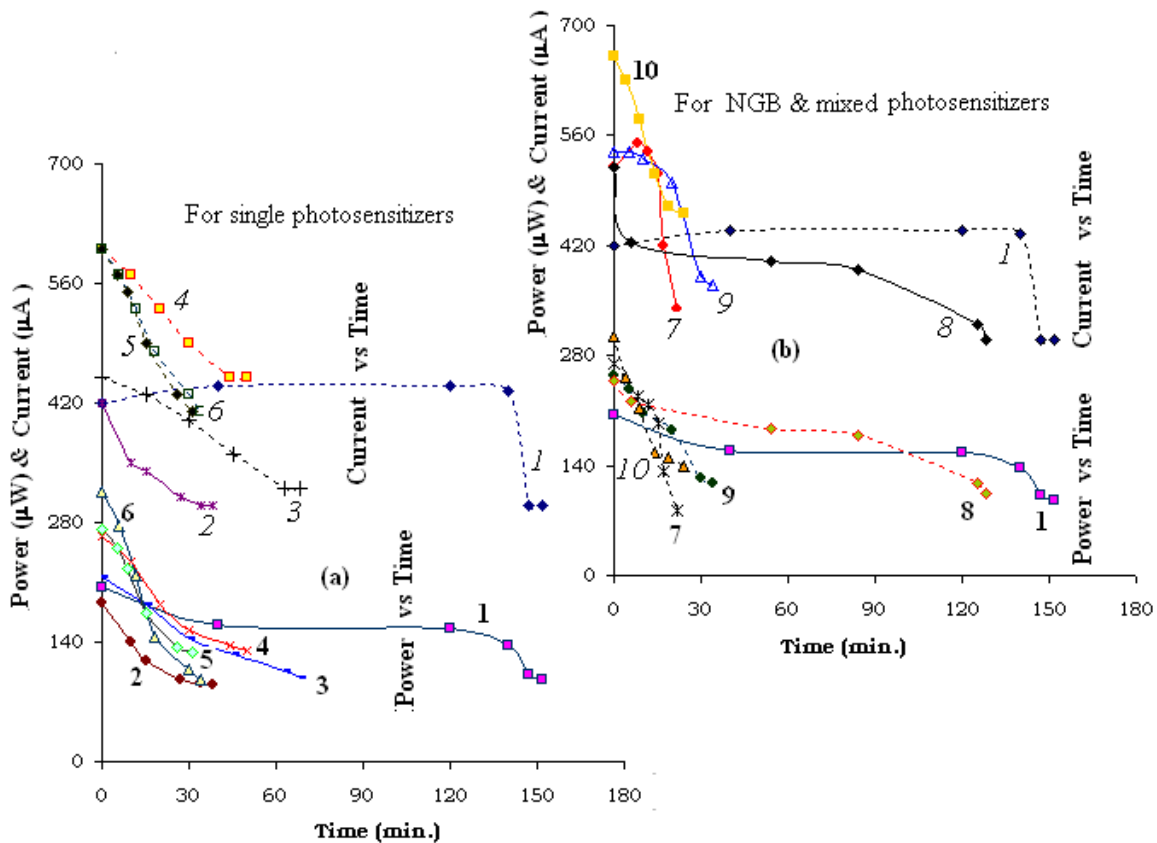

**Fig.S4(a,b).** Study of cell performance (i)Power vs Time( 1-10,bold& unitalic),(ii) CurrentvsTime(110,unbold&italic).1.NGB(714nm),2.FCF(622nm),3.BCB(622nm),4.S PE(435nm&680nm),5.RHD(543nm),6.SUD(476nm),7.NGB,FCF,8.NGB,FCF,SPE,9. NGB,FCF,RHD,10.NGB,FCF,BCB,SPE,RHD,SUD.

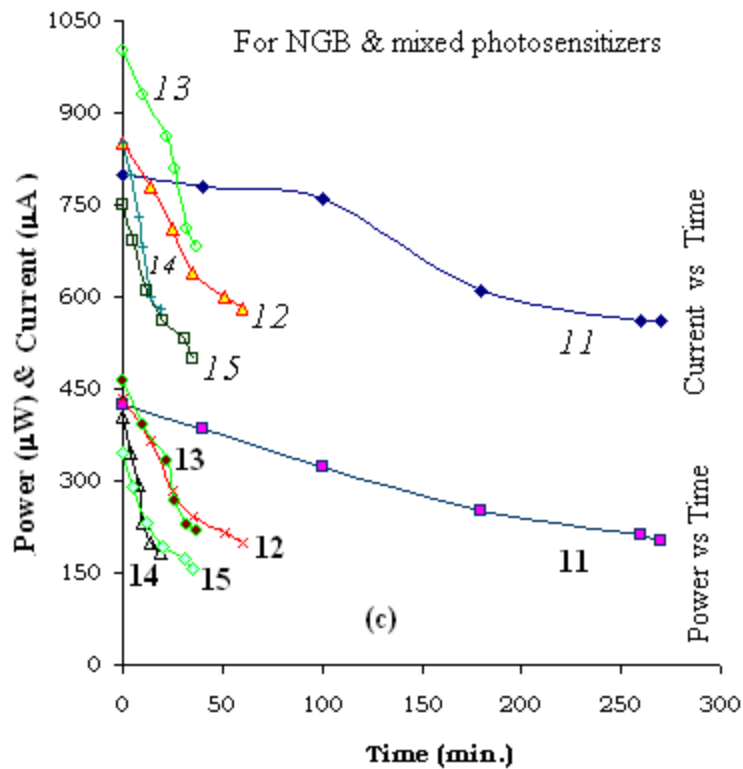

**Fig.S4(c).Study of cell performance (i) Power vs Time (11-15, bold & unitalic), (ii) Current vs Time (11-15, unbold & italic). 11.NGB,12.NGB,FCF,BCB,13.NGB,FCF,BCB,SPE,14.NGB,FCF,BCB,SPE,RHD,15.NGB,FCF,BCB,SPE,RHD,SUD.**

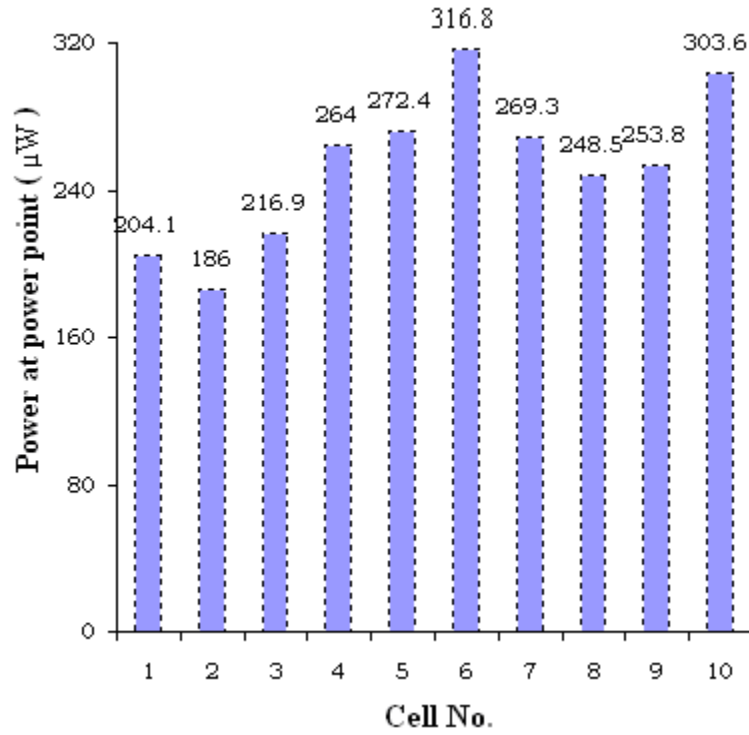

**Fig. S5(a).** Power at power point for various cells.

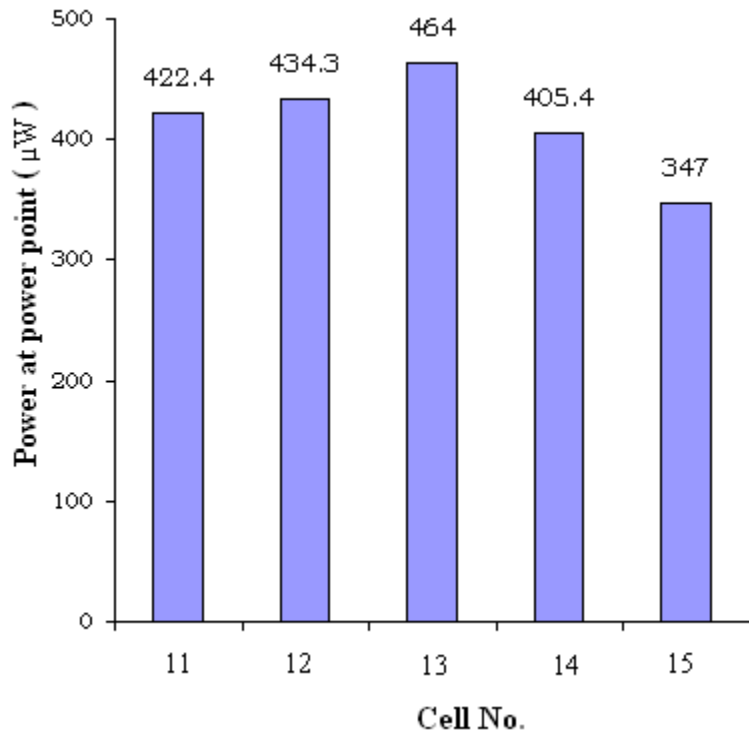

**Fig. S5(b).** Power at power point for various cells.

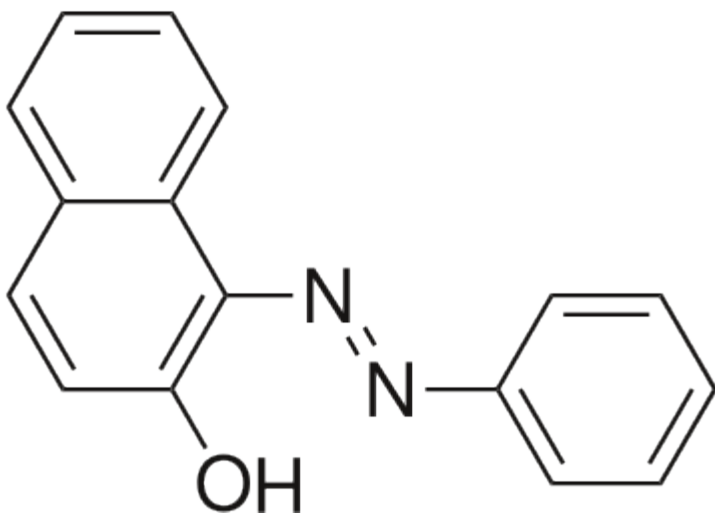

*Fig.S6(a)Structure of Sudan-I*

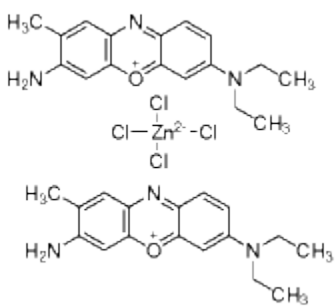

*Fig. S6(b)Structure of Brilliant Cresyl Blue (M.W. 385.96).*



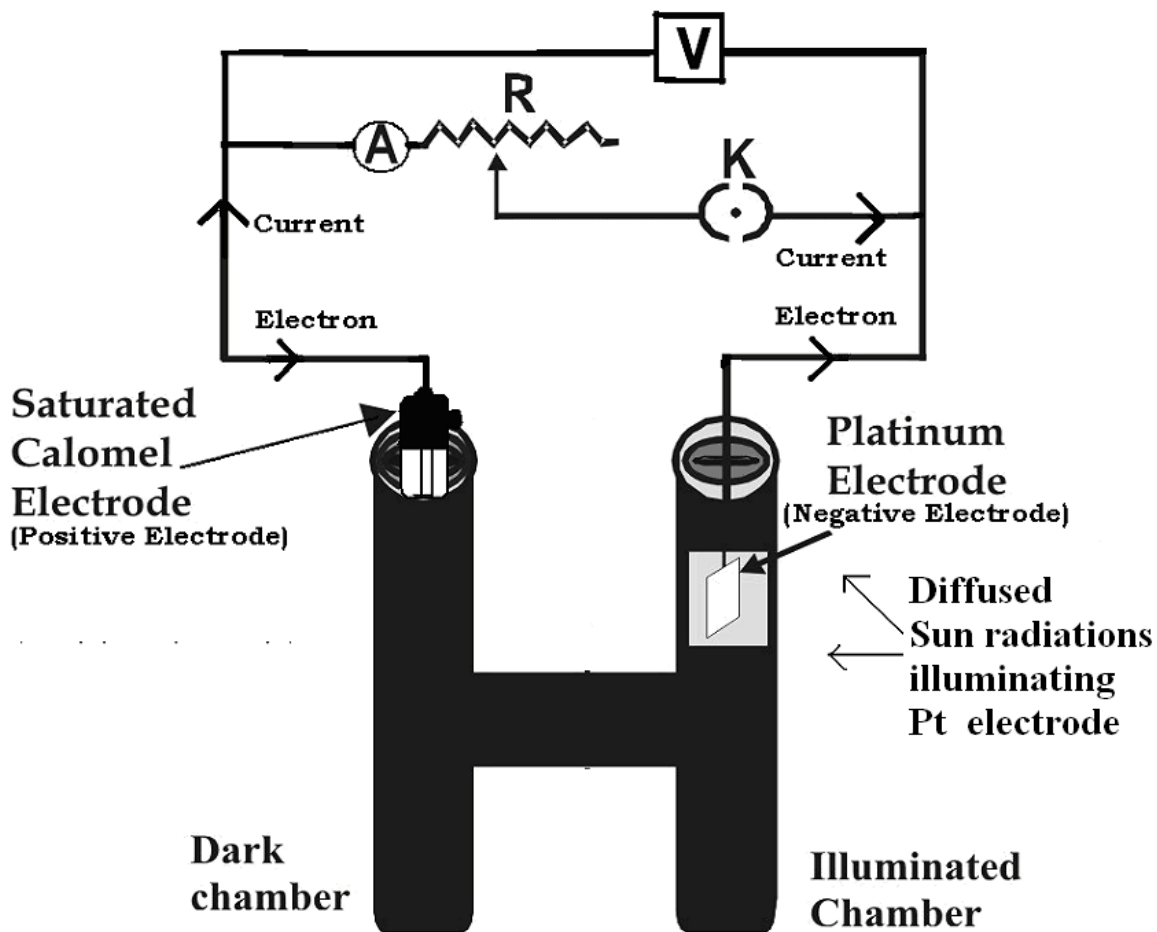

**Fig. S7:** Photogalvanic cell set-up. A, Micro-ammeter; K, Key; R, Resistance;; V, Digital pH meter.
